# Supplementary material
Source: PubMed Central journal article supplement (PMC5729910)
Supplement: NIHMS925295-supplement-2.pdf [file NIHMS925295-supplement-2.pdf]

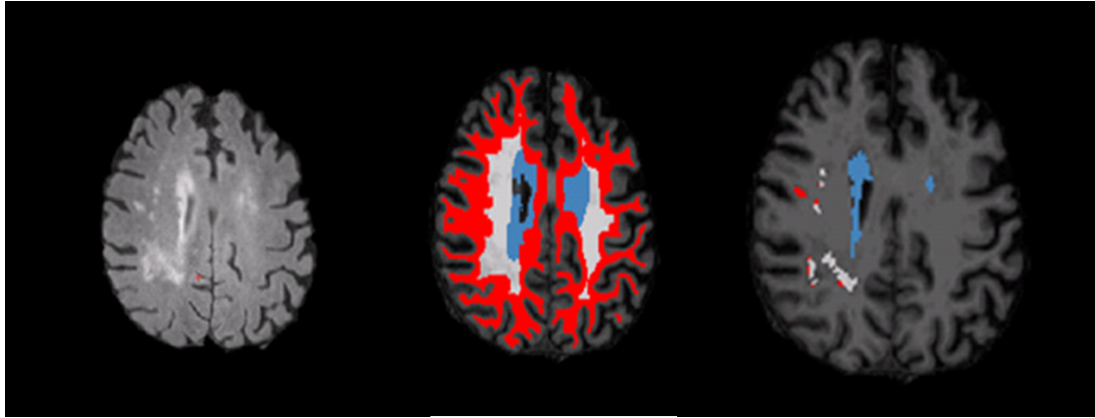

Supplemental Figure 1. Regional White Matter & Leukoaraiosis. This figure depicts a T2 FLAIR slice with white matter hyperintensities (left). A slice with a “regional mask” (middle) separated into a periventricular region (blue), deep region (white) and infracortical region (red). A slice (right) depicts the regional leukoaraiosis (LA) mask (blue = periventricular LA; white = deep LA; red = infracortical LA) defined by the intersection of leukoaraiosis mask and the regional white matter mask.
